# Supplementary material for: Photo-electroactive ternary chalcogenido-indate-stannates with a unique 2-D porous structure
Source: Royal Society of Chemistry journal article supplement (doi:10.1039/c4dt03333g), 2015-01-01
Supplement: c4dt03333g1.pdf [file c4dt03333g1.pdf]

## Electronic Supplementary Information (ESI)

### Photoelectroactive ternary chalcogenido-indate-stannates with a unique 2-D porous structure

Jing Wu, Ya-Yang Pu, Xiao-Wei Zhao, Li-Wen Qian, Guo-Qing Bian, Qin-Yu Zhu\* and Jie Dai\*

#### CONTENT

##### Figures:

**Figure S1.** Two types of 2-D structures of thiostannates: (a) ortho-hexagonal 24-atom ring, and (b) elliptical-hexagonal 32-atom ring.

**Figure S2.** EDS results of compounds **1-5**.

**Figure S3.** Thermogravimetric analysis of compounds **1-5**. Calculated weight loss of water and amine molecules: (a) 4.8 % and 6.2 % for **1**; (b) 3.8 % and 4.9 % for **2**; (c) 2.5 % and 4.1 % for **3**; (d) 2.0 % and 3.2 % for **4**; (e) 3.8 % and 4.9 % for **5**.

**Figure S4.** Asymmetric molecular structures of **1** (a), **2** (b), **3** (c), and **5**(d).

**Figure S5.** XRD results of compounds **1-5**.

**Figure S6.** Experimental and calculated XRD results of compounds **1-3** and **5**.

**Figure S7.** The 1-D tunnels formed by the windows of the porous 2-D anions, showing the orientation of Phen planes of the  $[\text{Ni}(\text{Phen})_3]^{2+}$  cations.

**Figure S8.** Photocurrent responses of the Ni-Phen compounds **1** and **2**.

**Table S1** The mole ratio of In:Sn measured by ICP.

## Figures

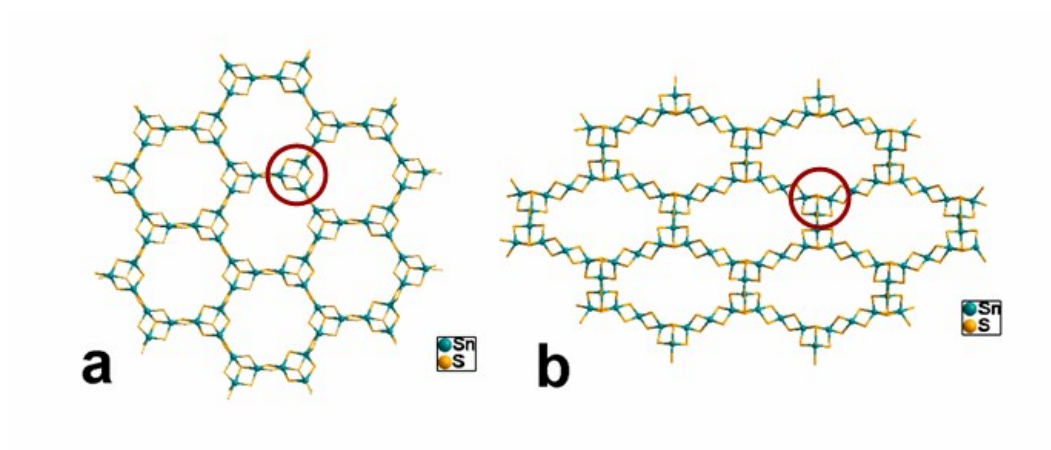

**Figure S1.** Two types of 2-D structures of thiostannates: (a) ortho-hexagonal 24-atom ring, and (b) elliptical-hexagonal 32-atom ring.

(a) InSnSNi (1)

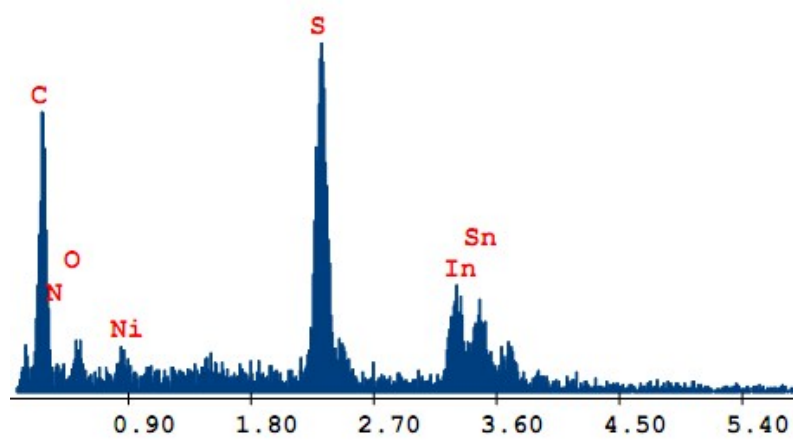

(b) InSnSeNi (2)

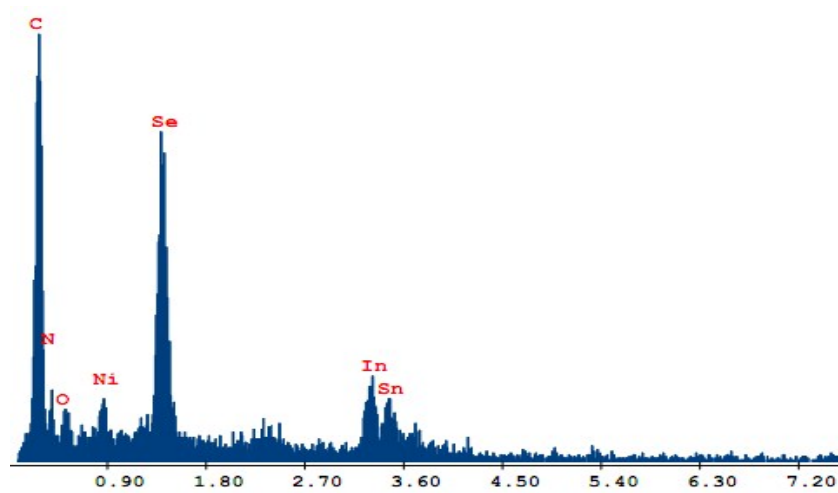

(c) InSnSFe (3)

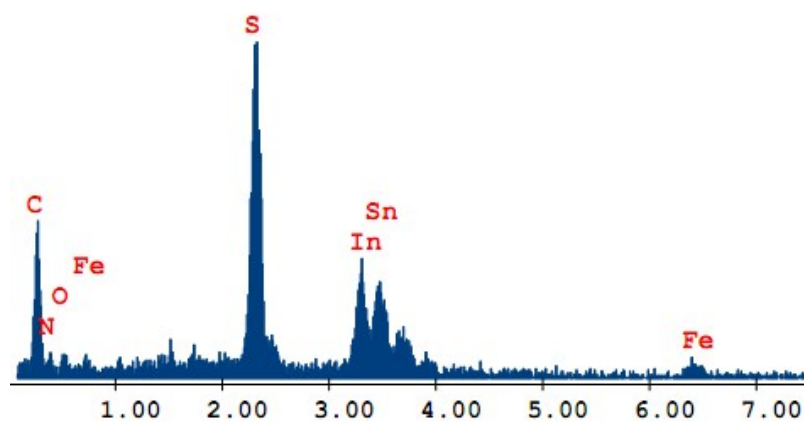

(d) InSnSeFe (4)

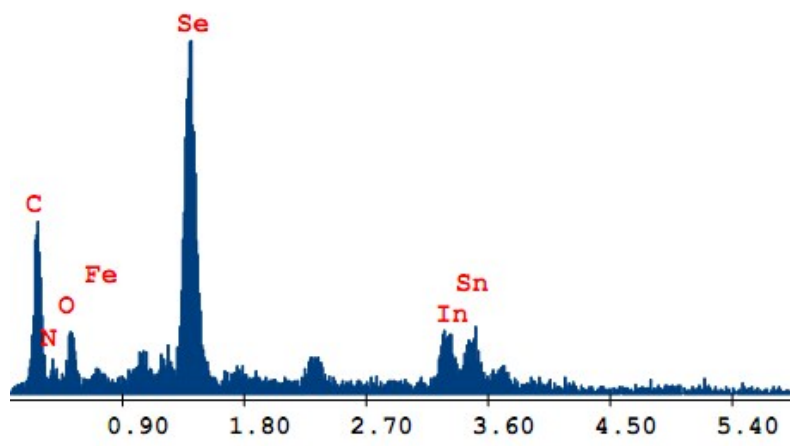

(e) InSnSeCo (5)

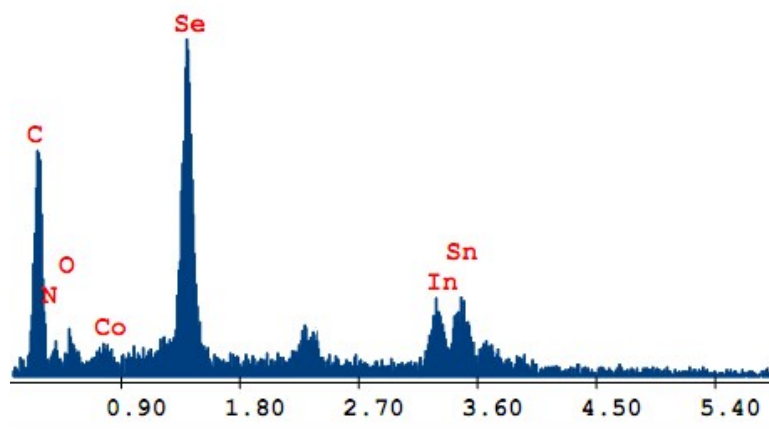

**Figure S2.** EDS results of compounds 1–5.

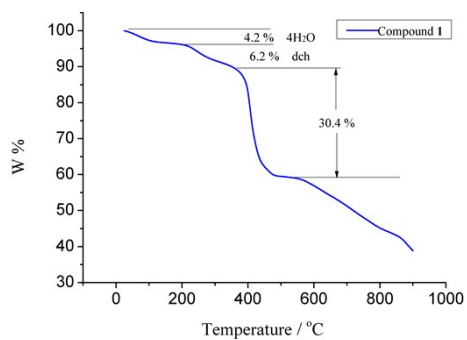

(a)

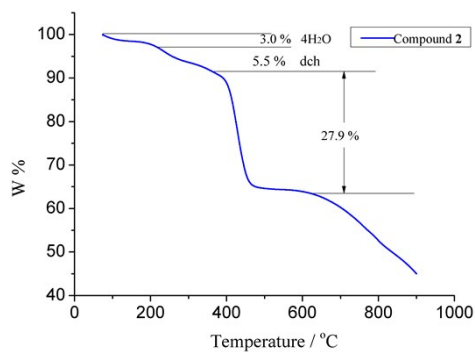

(b)

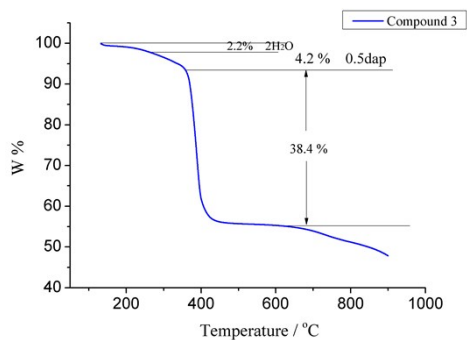

(c)

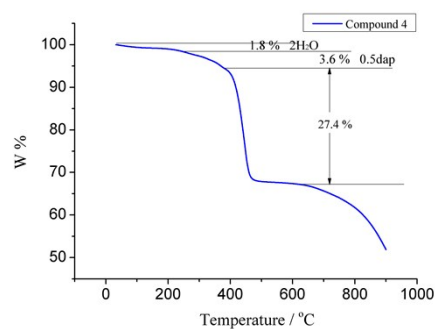

(d)

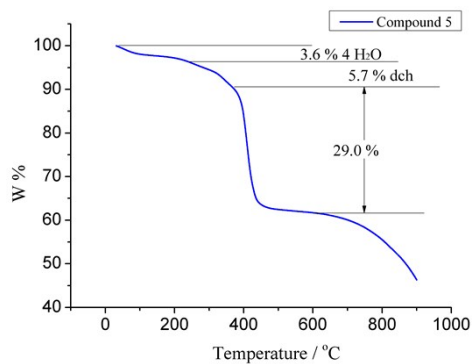

(e)

**Figure S3.** Thermogravimetric analysis of compounds 1-5. Calculated weight loss of water and amine molecules: (a) 4.8 % and 6.2 % for 1; (b) 3.8 % and 4.9 % for 2; (c) 2.5 % and 4.1 % for 3; (d) 2.0 % and 3.2 % for 4; (e) 3.8 % and 4.9 % for 5.

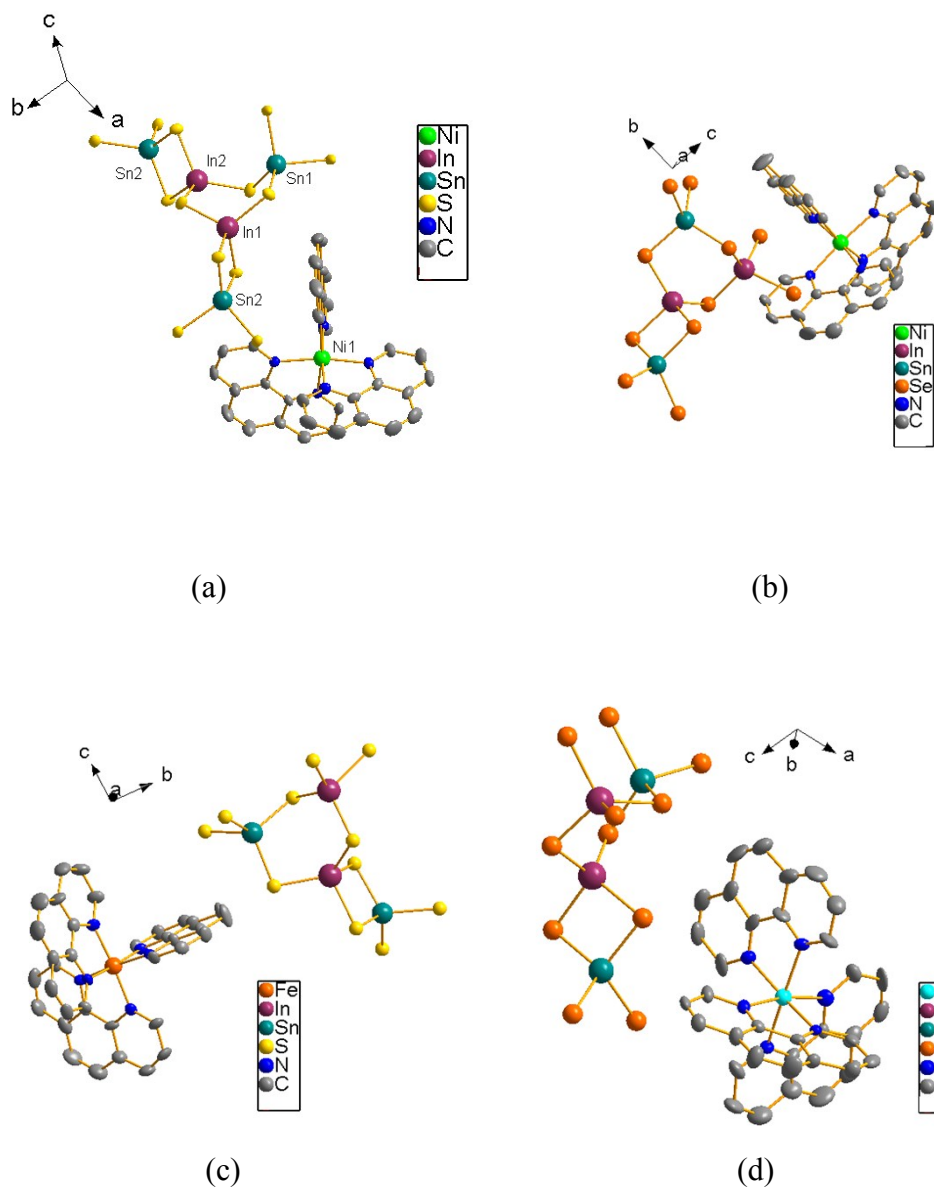

**Figure S4.** Asymmetric molecular structures of **1** (a), **2** (b), **3** (c), and **5**(d). The Sn and In atoms are temporary assigned for the convenience in crystallographic treatment. The In and Sn atom sites may be statistically occupied with In and Sn.

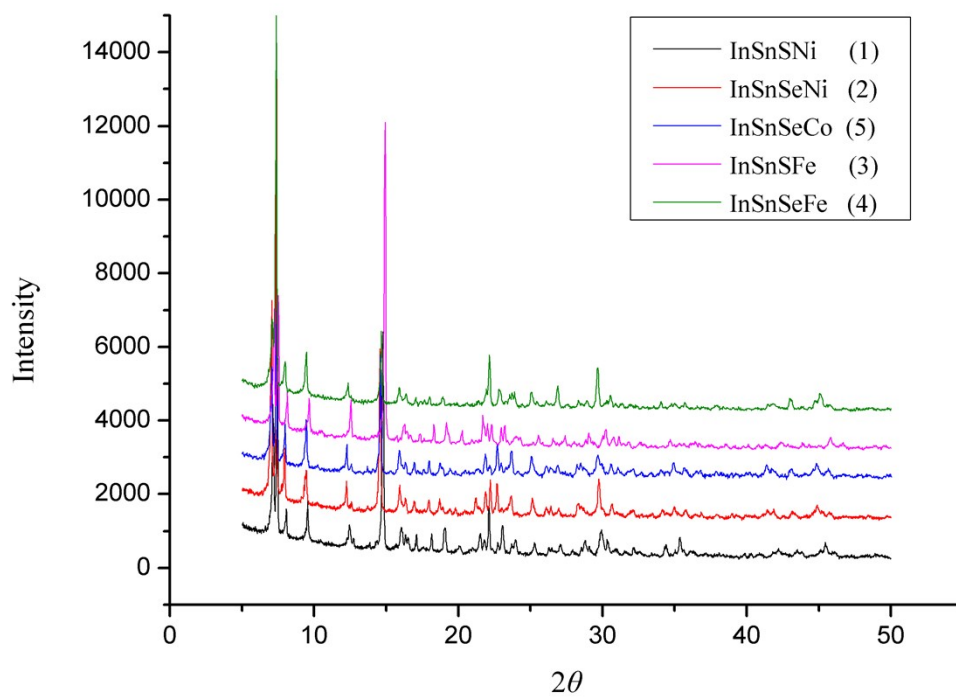

**Figure S5.** XRD results of compounds 1–5.

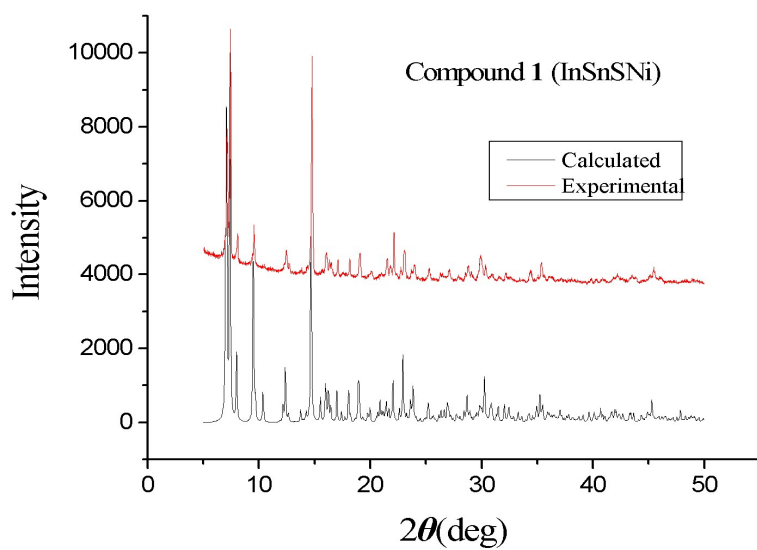

**(a)**

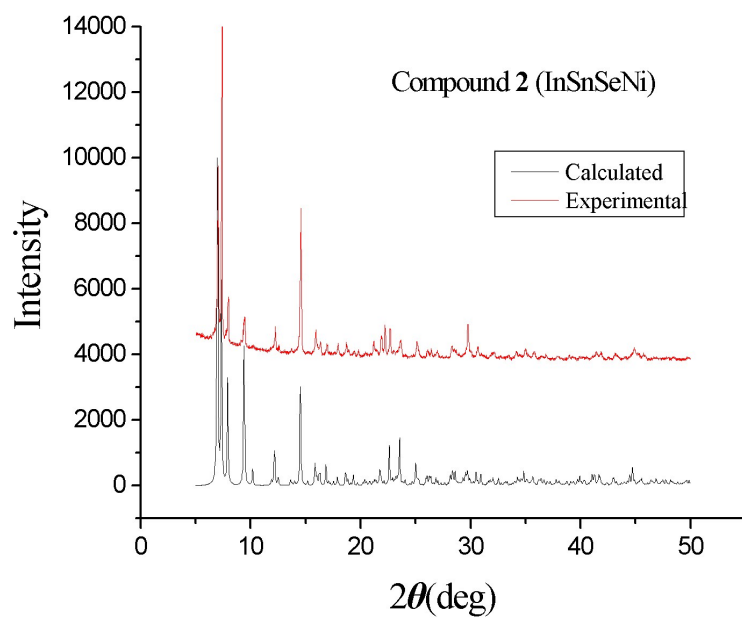

**(b)**



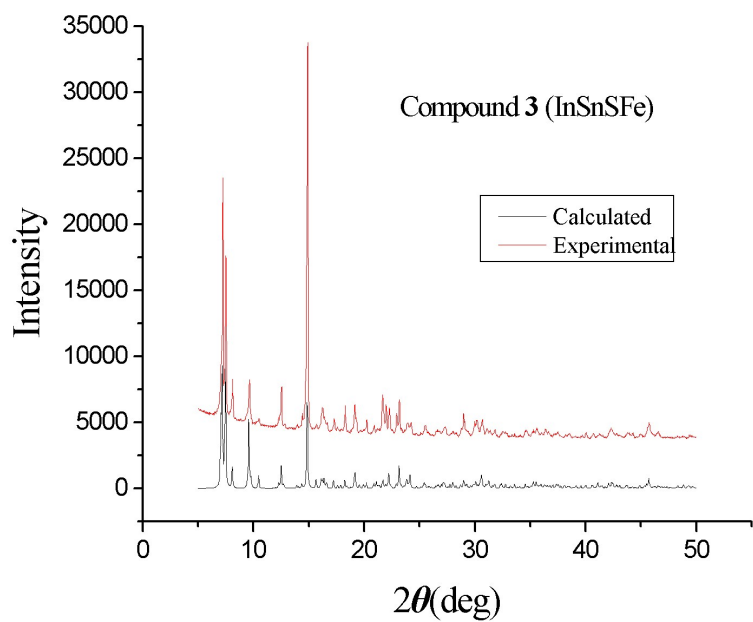

(c)

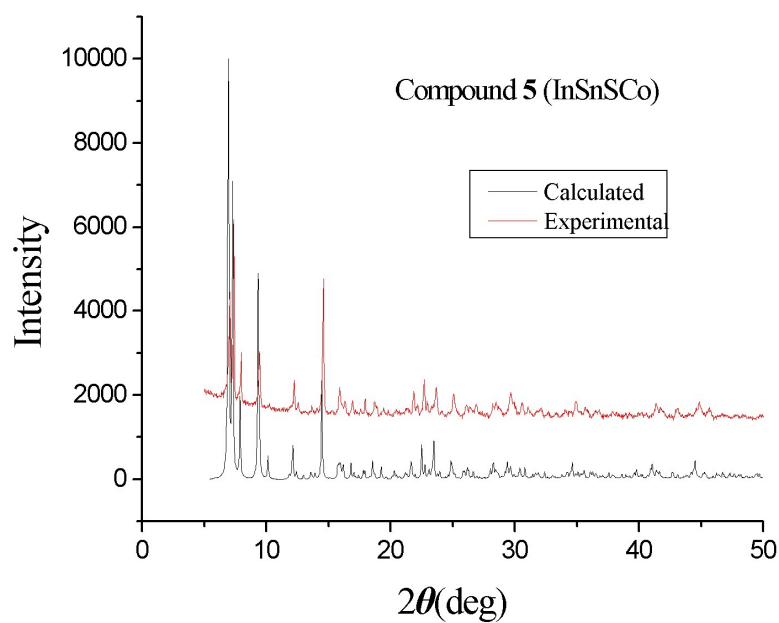

(d)

**Figure S6.** Experimental and calculated XRD results of compounds 1–3 and 5.

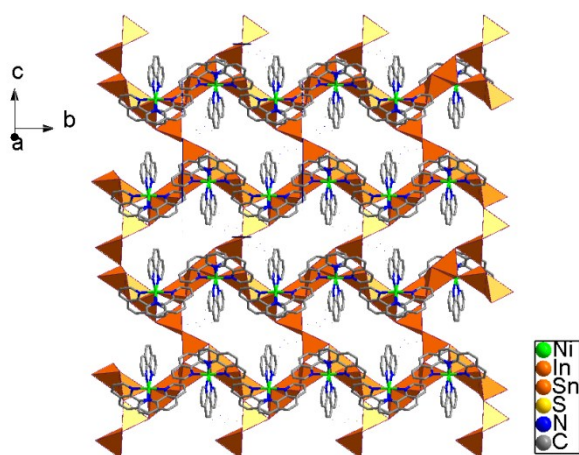

**Figure S7.** The 1-D tunnels formed by the windows of the porous 2-D anions, showing the orientation of Phen planes of the  $[\text{Ni}(\text{Phen})_3]^{2+}$  cations.

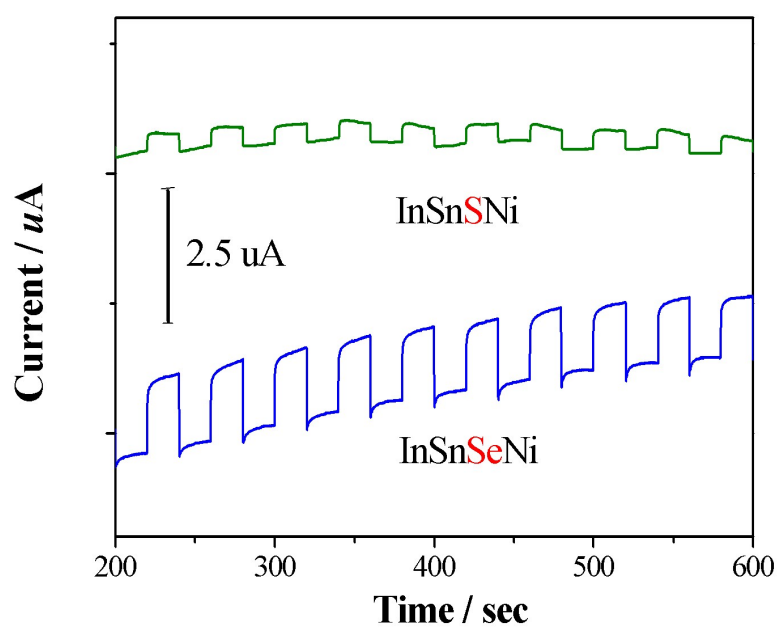

**Figure S8.** Photocurrent responses of the Ni-Phen compounds **1** and **2**.

**Table S1** The mole ratio of In:Sn measured by ICP.

|            | In (mg/dm <sup>3</sup> ) | Sn (mg/dm <sup>3</sup> ) | In:Sn<br>(in mole ratio) |
|------------|--------------------------|--------------------------|--------------------------|
| Compound 1 | 2.8837                   | 2.790                    | 1:0.936                  |
| Compound 2 | 3.6659                   | 3.641                    | 1:0.960                  |
| Compound 3 | 2.9137                   | 2.712                    | 1:0.900                  |
| Compound 4 | 3.3368                   | 2.771                    | 1:0.805                  |
| Compound 5 | 2.4476                   | 2.856                    | 1:1.128                  |
